# Supplementary material for: Modular syntheses of multidentate ligands with variable N-donors: applications to tri- and tetracopper(i) complexes
Source: Royal Society of Chemistry journal article supplement (doi:10.1039/b705806c), 2007-01-01
Supplement: b705806c.pdf [file b705806c.pdf]

**Supporting Information**

**For**

**Modular Syntheses of Multidentate Ligands with Variable N-Donors: Applications to Tri- and Tetracopper(I) Complexes**

**Eric C. Brown,<sup>a</sup> Brandon Johnson,<sup>a</sup> Sara Palavicini,<sup>b</sup> Luigi Casella<sup>b</sup> and William B. Tolman<sup>\*a</sup>**

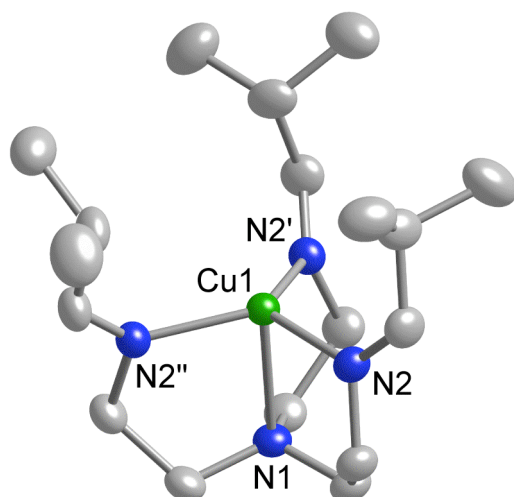

**Figure S1.** Representation of the cationic portion of the X-ray crystal structure of **19**, showing all nonhydrogen atoms as 50% thermal ellipsoids. Selected bond distances (Å) and angles (deg) are as follows: Cu1-N2, 1.9802(15); Cu1-N1, 2.225(3); N2-Cu1-N2', 119.111(14); N2-Cu1-N1, 84.56(4).

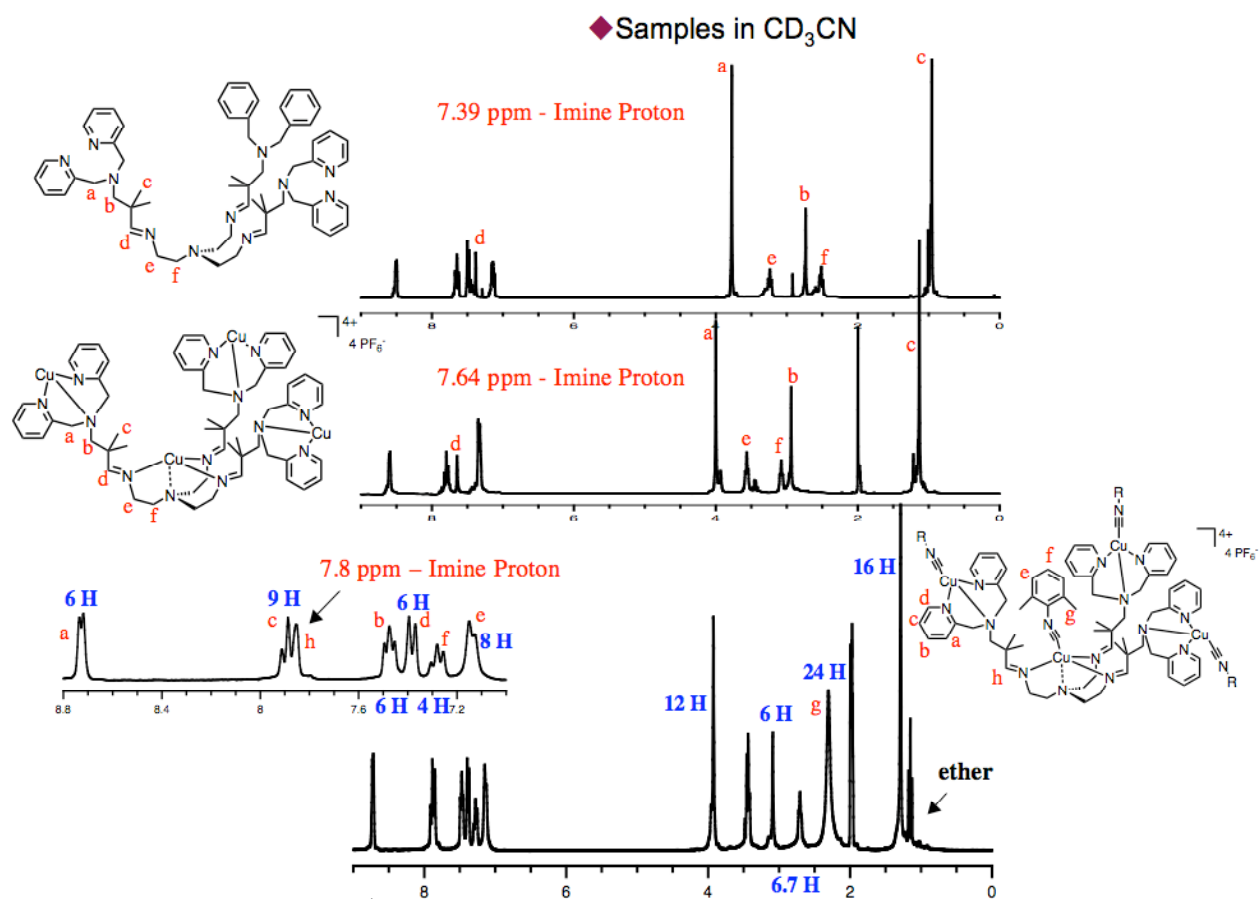

**Figure S2.** Representative <sup>1</sup>H NMR data showing how the imine proton resonance shifts upon Cu(I) complexation.
